# Supplementary material
Source: PubMed Central journal article supplement (PMC6142960)
Supplement: jamasurg-153-728-s001.pdf [file jamasurg-153-728-s001.pdf]

## Supplementary Online Content

Mull HJ, Graham LA, Morris MS, et al. Association of postoperative readmissions with surgical quality using a Delphi consensus process to identify relevant diagnosis codes. Published online April 18, 2018. *JAMA Surg*. doi:10.1001/jamasurg.2018.0592

**eTable.** *ICD-9* and *ICD-10* Codes for Readmission Reasons Associated by Consensus With Surgical Quality–Related Problems

**eReferences**

This supplementary material has been provided by the authors to give readers additional information about their work.

eTable. ICD-9 and ICD-10 Codes for Readmission Reasons Associated by Consensus With Surgical Quality–Related Problems

| Readmission Reason                            | ICD-9 Code                                                           | ICD-10 Code                                                                                                                                                                                                                                                                                                                                                                                                                                                                                                                                                                                                                                                                                                                                                                                                                                                                                                                                       |
|-----------------------------------------------|----------------------------------------------------------------------|---------------------------------------------------------------------------------------------------------------------------------------------------------------------------------------------------------------------------------------------------------------------------------------------------------------------------------------------------------------------------------------------------------------------------------------------------------------------------------------------------------------------------------------------------------------------------------------------------------------------------------------------------------------------------------------------------------------------------------------------------------------------------------------------------------------------------------------------------------------------------------------------------------------------------------------------------|
| <b>Wound-Related Code</b>                     |                                                                      |                                                                                                                                                                                                                                                                                                                                                                                                                                                                                                                                                                                                                                                                                                                                                                                                                                                                                                                                                   |
| Postoperative abscess/septicemia              | 998.59                                                               | K6811, T814XXA                                                                                                                                                                                                                                                                                                                                                                                                                                                                                                                                                                                                                                                                                                                                                                                                                                                                                                                                    |
| Acute abscess/diffuse cellulitis/lymphangitis | 682.0, 682.1, 682.2, 682.3, 682.4, 682.5, 682.6, 682.7, 682.8, 682.9 | K122, L03119, L03129, L03211, L03212, L03213, L03221, L03222, L03317, L03319, L03329, L03811, L03818, L03891, L03898, L0390, L0391                                                                                                                                                                                                                                                                                                                                                                                                                                                                                                                                                                                                                                                                                                                                                                                                                |
| Wound disruption/dehiscence/rupture           | 998.30, 998.31, 998.32, 998.33                                       | T8130XA, T8131XA, T8132XA, T8133XA                                                                                                                                                                                                                                                                                                                                                                                                                                                                                                                                                                                                                                                                                                                                                                                                                                                                                                                |
| Amputation infection                          | 997.62                                                               | T8740, T8741, T8742, T8743, T8744                                                                                                                                                                                                                                                                                                                                                                                                                                                                                                                                                                                                                                                                                                                                                                                                                                                                                                                 |
| Infected postoperative seroma                 | 998.51                                                               | T814XXA, T792XXA                                                                                                                                                                                                                                                                                                                                                                                                                                                                                                                                                                                                                                                                                                                                                                                                                                                                                                                                  |
| Peritoneal abscess                            | 567.22, 540.1                                                        | K651, K353                                                                                                                                                                                                                                                                                                                                                                                                                                                                                                                                                                                                                                                                                                                                                                                                                                                                                                                                        |
| <b>Bleeding Code</b>                          |                                                                      |                                                                                                                                                                                                                                                                                                                                                                                                                                                                                                                                                                                                                                                                                                                                                                                                                                                                                                                                                   |
| Hemorrhage or hematoma                        | 285.1, 459.0, 958.2, 998.11, 998.12, 998.13                          | D62, R58, T792XXA, D7801, D7802, D7821, D7822, D7831, D7832, D7833, D7834, E3601, E3602, E89810, E89811, E89820, E89821, E89822, E89823, G9731, G9732, G9751, G9752, G9761, G9762, G9763, G9764, H59111, H59112, H59113, H59119, H59121, H59122, H59123, H59129, H59311, H59312, H59313, H59319, H59321, H59322, H59323, H59329, H59331, H59332, H59333, H59339, H59341, H59342, H59343, H59349, H59351, H59352, H59353, H59359, H59361, H59362, H59363, H59369, H9521, H9522, H9541, H9542, H9551, H9552, H9553, H9554, I97410, I97411, I97418, I9742, I97610, I97611, I97618, I97620, I97621, I97622, I97630, I97631, I97638, I97640, I97641, I97648, J9561, J9562, J95830, J95831, J95860, J95861, J95862, J95863, K9161, K9162, K91840, K91841, K91870, K91871, K91872, K91873, L7601, L7602, L7621, L7622, L7631, L7632, L7633, L7634, M96810, M96811, M96830, M96831, M96840, M96841, M96842, M96843, N9961, N9962, N99820, N99821, N99840, |

|                                                              |                                                                                                                                                                       |                                                                                                                                                                                                                                                                                                                                                                  |
|--------------------------------------------------------------|-----------------------------------------------------------------------------------------------------------------------------------------------------------------------|------------------------------------------------------------------------------------------------------------------------------------------------------------------------------------------------------------------------------------------------------------------------------------------------------------------------------------------------------------------|
|                                                              |                                                                                                                                                                       | N99841, N99842, N99843, T888XXA                                                                                                                                                                                                                                                                                                                                  |
| <b>Gastrointestinal-Related Codes</b>                        |                                                                                                                                                                       |                                                                                                                                                                                                                                                                                                                                                                  |
| Ostomy care/complications                                    | V55.0, V55.1, V55.2, V55.3, V55.4, V55.5, V55.6, 569.60, 569.61, 569.69                                                                                               | K9400, K9402, K9409, K9410, K9412, K9419, Z430, Z431, Z432, Z433, Z434, Z435, Z436                                                                                                                                                                                                                                                                               |
| <b>Device Complications</b>                                  |                                                                                                                                                                       |                                                                                                                                                                                                                                                                                                                                                                  |
| Catheter-related bloodstream infection                       | 996.62, 996.69, 999.31, 999.32, 999.33                                                                                                                                | T80211A, T80212A, T80219A, T827XXA, T8579XA                                                                                                                                                                                                                                                                                                                      |
| <b>Renal Failure and Electrolyte Disorders</b>               |                                                                                                                                                                       |                                                                                                                                                                                                                                                                                                                                                                  |
| Other fluid and electrolyte disorders                        | 276.0, 276.1, 276.2, 276.3, 276.4, 276.50, 276.51, 276.52, 276.61, 276.69, 276.7, 276.8, 276.9                                                                        | E860, E861, E869, E870, E871, E872, E873, E874, E875, E876, E8770, E8771, E8779, E878                                                                                                                                                                                                                                                                            |
| Acute renal failure                                          | 584.5, 584.6, 584.7, 584.8, 584.9                                                                                                                                     | N170, N171, N172, N178, N179                                                                                                                                                                                                                                                                                                                                     |
| <b>Other</b>                                                 |                                                                                                                                                                       |                                                                                                                                                                                                                                                                                                                                                                  |
| Anemia                                                       | 280.0, 280.1, 280.9, 285.1, 285.9                                                                                                                                     | D1800, D1801, D1809, D62, D649                                                                                                                                                                                                                                                                                                                                   |
| Urinary tract infection                                      | 599.0, 996.64                                                                                                                                                         | N390, T83510A, T83511A, T83512A, T83518A                                                                                                                                                                                                                                                                                                                         |
| Bacterial pneumonia                                          | 482.0, 482.1, 482.2, 482.3, 482.30, 482.31, 482.32, 482.39, 482.4, 482.40, 482.41, 482.49, 482.8, 482.81, 482.82, 482.83, 482.84, 482.89, 482.9, 485, 486, 507.0, 514 | A481, J14, J150, J151, J1520, J15211, J15212, J1529, J153, J154, J155, J156, J158, J159, J180, J182, J189, J690, J811                                                                                                                                                                                                                                            |
| PSI postoperative sepsis                                     | 038.0, 038.10, 038.11, 038.19, 038.2, 038.3, 038.4, 038.41, 038.42, 038.43, 038.44, 038.49, 038.8, 038.9, 785.52, 785.59, 995.91, 995.92, 998.0                       | A400, A401, A403, A408, A409, A4101, A4102, A411, A412, A413, A414, A4150, A4151, A4152, A4153, A4159, A4181, A4189, A419, A5486, B377, R571, R6520, R6521, T8110XA, T8111XA, T8112XA                                                                                                                                                                            |
| PSI postoperative pulmonary embolism or deep vein thrombosis | 415.11, 415.19, 451.11, 451.19, 451.2, 451.81, 451.9, 453.40, 453.41, 453.42, 453.87, 453.89, 453.9                                                                   | I2690, I2699, I8010, I80209, I80211, I80212, I80213, I80219, I80232, I80233, I80239, I80291, I80292, I80293, I80299, I803, I809, I82210, I82220, I82221, I82290, I82401, I82402, I82403, I82409, I82411, I82412, I82413, I82419, I82421, I82422, I82423, I82429, I82431, I82432, I82433, I82439, I82449, I82499, I824Y1, I824Y2, I824Y3, I824Y9, I824Z9, I82609, |

|  |  |                                                                                                           |
|--|--|-----------------------------------------------------------------------------------------------------------|
|  |  | I82619, I82629, I82890, I8290, I8291, I82A19, I82B19, I82C19, T800XXA, T81718A, T8172XA, T82817A, T82818A |
|--|--|-----------------------------------------------------------------------------------------------------------|

Abbreviations: ICD-9, *International Classification of Diseases, Ninth Revision*; ICD-10, *International Classification of Diseases, Tenth Revision*; PSI, Agency for Healthcare Research and Quality patient safety indicator.<sup>1</sup>

<sup>a</sup>The Delphi panel comprised 14 individuals. Each panelist rated readmission reasons on a scale of 1 to 5, with 1 indicating never related and 5, directly related to index surgery quality. *Consensus* was defined as interquartile range of 1 or lower.

<sup>b</sup>ICD-10 codes are from the 2018 General Equivalence Mappings.<sup>2</sup>

#### References

1. Agency for Healthcare Research and Quality. Patient safety indicators overview. [http://www.qualityindicators.ahrq.gov/Modules/psi\\_resources.aspx](http://www.qualityindicators.ahrq.gov/Modules/psi_resources.aspx). Accessed October 1, 2017.
2. Centers for Medicare & Medicaid Services. 2018 ICD-10 CM and GEMs. <https://www.cms.gov/Medicare/Coding/ICD10/2018-ICD-10-CM-and-GEMs.html>. Modified August 11, 2017. Accessed March 12, 2018.
